# Supplementary material
Source: PubMed Central journal article supplement (PMC7961470)
Supplement: jamainternmed-e210152-s001.pdf [file jamainternmed-e210152-s001.pdf]

## Supplementary Online Content

Patel AA, Ryan GW, Tisnado D, et al. Deficits in advance care planning for patients with decompensated cirrhosis at liver transplant centers. *JAMA Intern Med*. Published online March 15, 2021. doi: 10.1001/jamainternmed.2021.0152

### **eTable.** Characteristics of Transplant Centers Included in Study

This supplementary material has been provided by the authors to give readers additional information about their work.

**eTable.** Characteristics of Transplant Centers Included in Study

| <b>Characteristic</b>           | <b>Center 1</b> | <b>Center 2</b> | <b>Center 3</b> |
|---------------------------------|-----------------|-----------------|-----------------|
| <b>Patient Gender*</b>          |                 |                 |                 |
| Male                            | 64.6%           | 50.2%           | 58.3%           |
| Female                          | 35.4%           | 49.8%           | 41.7%           |
| <b>Patient Age*</b>             |                 |                 |                 |
| 18-49                           | 18.4%           | 25.6%           | 25.7%           |
| 50-64                           | 59.2%           | 52.7%           | 44.6%           |
| 65+                             | 22.5%           | 21.6%           | 23.5%           |
| <b>Patient Race/Ethnicity*</b>  |                 |                 |                 |
| Caucasian                       | 47.6%           | 26.1%           | 44.0%           |
| Hispanic                        | 42.2%           | 56.7%           | 39.7%           |
| Black                           | 1.4%            | 2.0%            | 4.2%            |
| Asian                           | 4.8%            | 13.8%           | 11.4%           |
| Other                           | 4.1%            | 1.5%            | 0.7%            |
| <b>Staffing Characteristics</b> |                 |                 |                 |
| # Hepatologists                 | 7               | 3               | 7               |
| # Nurse Practitioners           | 2               | 6               | 2               |
| # Hepatobiliary Surgeons        | 5               | 4               | 8               |
| # Transplant Coordinators       | 5               | 4               | 6               |
| # Social Workers                | 2               | 3               | 2               |

\*data from 07/01/2018 to 06/30/2019 (Scientific Registry for Transplant Recipients)—all centers performed 111-154 transplants during this period.
